# Supplementary material for: The North American Carbon Program Multi-scale Synthesis and Terrestrial Model Intercomparison Project – Part 2: Environmental driver data
Source: Copernicus journal article supplement (doi:10.5194/gmd-7-2875-2014), 2014-12-05
Supplement: Supplementary file 1 [file gmd-7-2875-2014-supplement.zip]

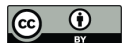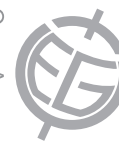

*Supplement of*

## **The North American Carbon Program Multi-scale Synthesis and Terrestrial Model Intercomparison Project – Part 2: Environmental driver data**

**Y. Wei et al.**

*Correspondence to:* Y. Wei ([weiy@ornl.gov](mailto:weiy@ornl.gov))

- [gmd-7-2875-2014-supplement-cover-letter.pdf](#)
- [Revised\\_MsTMIPDriverData\\_v12\\_Final\\_SI\\_r1.docx](#)
- [\\_\\_MACOSX](#)
  - [.\\_Revised\\_MsTMIPDriverData\\_v12\\_Final\\_SI\\_r1.docx](#)
